# Supplementary material for: A Vaccine Strategy Based on the Identification of an Annular Ganglioside Binding Motif in Monkeypox Virus Protein E8L
Source: MDPI journal article supplement (doi:10.3390/v14112531), 2022-11-16

## Supplementary Materials

### **A Vaccine Strategy Based on the Identification of an Annular Ganglioside Binding Motif in Monkeypox Virus Protein E8L**

**Jacques Fantini <sup>1\*</sup>, Henri Chahinian <sup>1</sup> and Nouara Yah <sup>1</sup>**

<sup>1</sup>INSERM UMR\_S-1072 and Faculty of Medicine, Aix-Marseille Université,  
Boulevard Pierre Dramard 13015 Marseille, France

\*Correspondence: [jacques.fantini@univ-amu.fr](mailto:jacques.fantini@univ-amu.fr)

-----

**Figure S1: Amino acid sequence of Monkeypox E8L protein  
(Uniprot entry Q8V4Y0)**

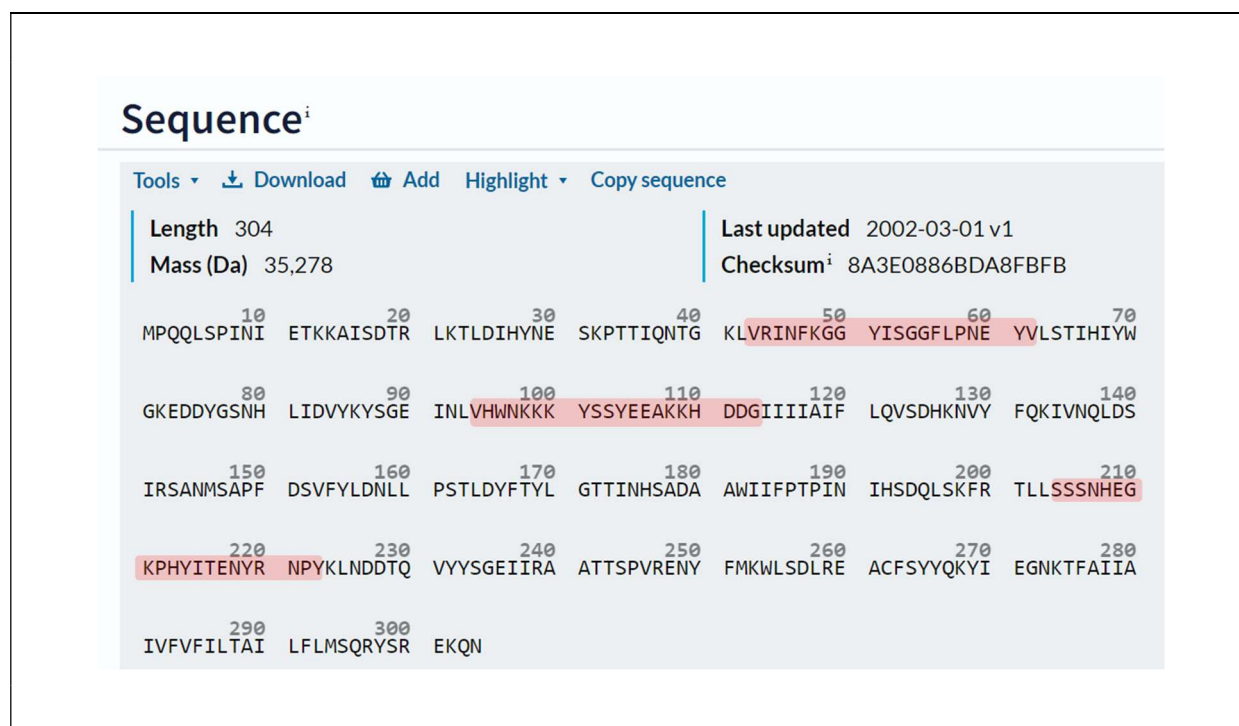

The three B linear epitopes are highlighted:

43–62 (VRINFKGGYISGGFLPNEYV)

94–113 (VHWNKKKYSSYEEAKKHDDG)

204–223 (SSSNHEGKPHYITENYRNPY)

Figure S2: Extraction of energies of interaction of the E8L-raft complex from Molegro (raw data)

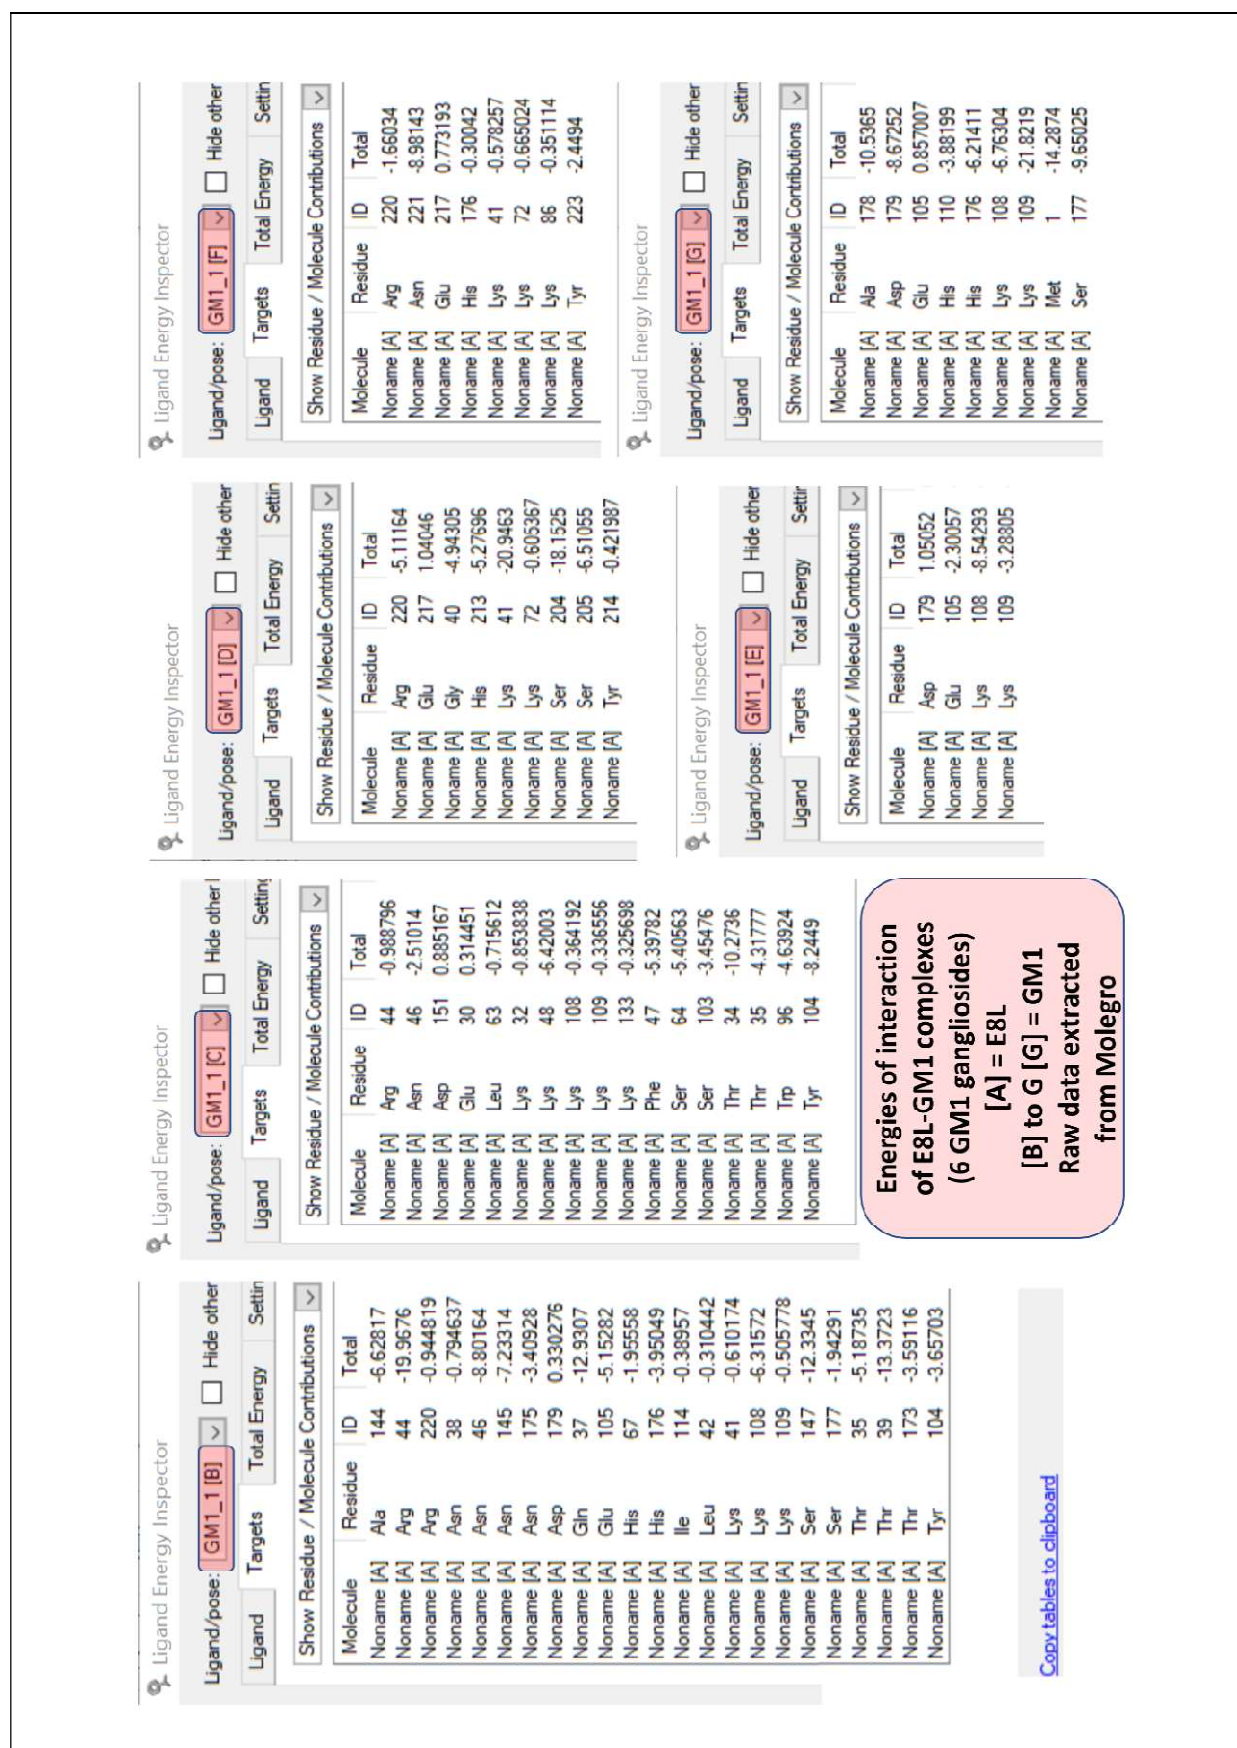

**Figure S3: B epitope prediction by BepiPred (raw data)**

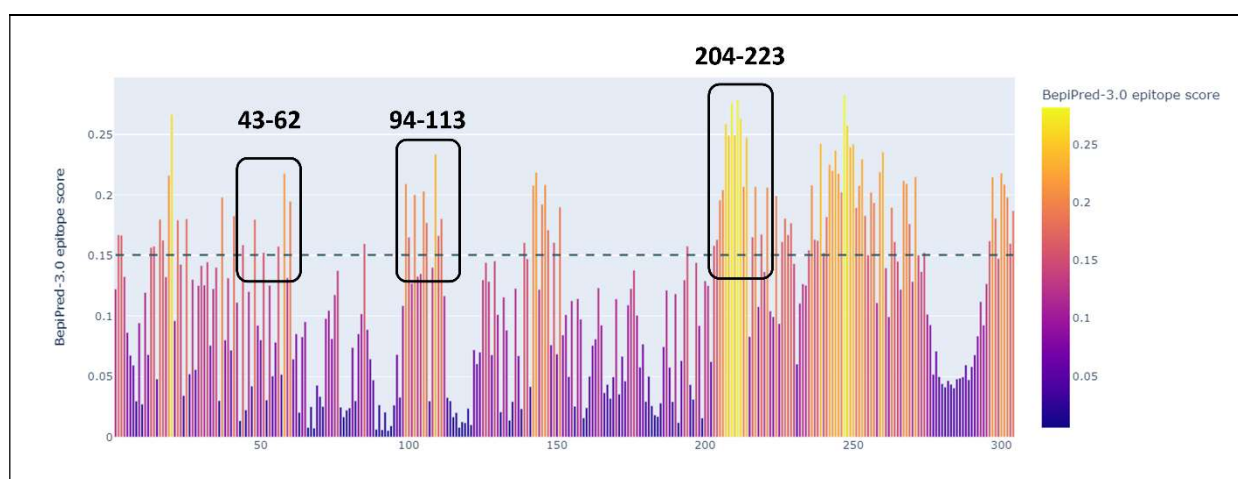

**Figure S4: B epitope prediction by BcePred (raw data)**

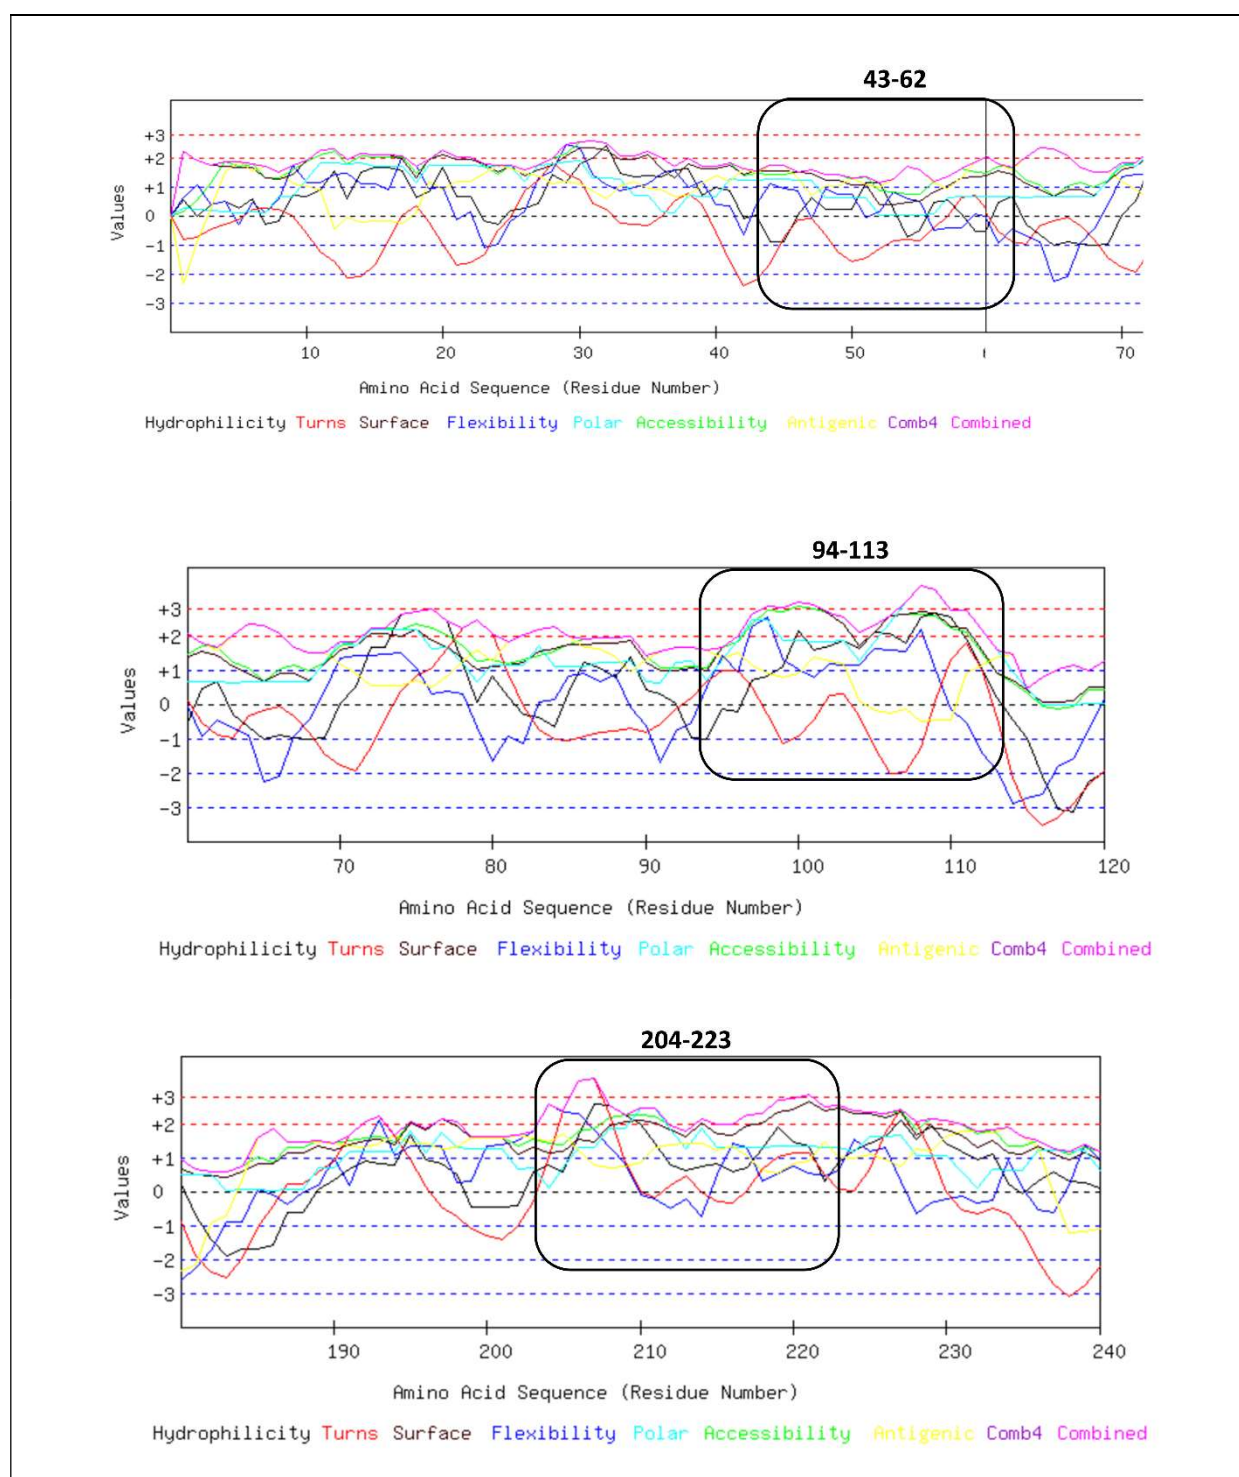

Supplement: s1 [file s1]
